# Supplementary material
Source: Research Square preprint supplement (doi:10.21203/rs.3.rs-9901552/v1)
Supplement: Supplementary file 1 [file 3108bc4374d3213b632471a3.xlsx]

## Sheet: README
Additional file 2. Differential-expression tables with FDR-adjusted q-values.
Sheets:
ER_unique_miRNAs — 11 ER-associated mature miRNAs at nominal P < 0.01 (limma).
HER2_unique_miRNAs — 14 HER2-associated unique mature miRNAs at nominal P < 0.01.
HER2_probe_level — Full probe-level HER2 results (17 probe sets) with redundancy annotation.
Methods — Statistical method summary.
q-values: Benjamini-Hochberg adjusted over all 1,629 tested miRNAs (m = 1629).
Fold change > 1 = higher in REFERENCE group (ER- or HER2-);
Fold change < 1 = higher in CONDITION group (ER+ or HER2+).
Note: with m = 1,629 tests in a cohort of this size, no candidate reaches the
conventional q < 0.05 threshold in the discovery cohort. The strongest HER2
candidate (miR-4728, q = 0.85) replicates at genome-wide significance in TCGA-BRCA
(see Additional file 3). All candidates should be regarded as exploratory.

## Sheet: ER_unique_miRNAs
Rank	miRNA	Nominal P	BH q-value	Mean ER-	Mean ER+	Fold change	Higher in
1	miR-7-2	0.0025187	1	11.7	9.87	1.19	ER-
2	miR-4468	0.0040652	1	17.26	14.48	1.19	ER-
3	miR-6812	0.0042029	1	39.36	46.9	0.84	ER+
4	miR-548i-2	0.0055767	1	37.53	52.81	0.71	ER+
5	miR-1278	0.0072604	1	22.3	28.48	0.78	ER+
6	miR-548ba	0.0073122	1	10.51	13.87	0.76	ER+
7	miR-8086	0.0075082	1	71.73	86.76	0.83	ER+
8	miR-378d-2	0.0077856	1	32.05	25.74	1.25	ER-
9	miR-190a	0.008613	1	29.84	22.07	1.35	ER-
10	miR-92b	0.0087986	1	29.78	47.47	0.63	ER+
11	miR-1273f	0.0098231	1	66.71	80.08	0.83	ER+

## Sheet: HER2_unique_miRNAs
Rank	miRNA (mature)	Probe set(s)	Nominal P	BH q-value	Mean HER2-	Mean HER2+	Fold change	Higher in
1	miR-4728	MIR4728	0.0005228	0.85	1187.02	5964.93	0.2	HER2+
2	miR-7641	MIR7641-2 (two probes; see prob.)	0.0029807	0.87	278301	159573	1.74	HER2-
3	miR-4311	MIR4311	0.0051466	0.87	53.56	64.06	0.84	HER2+
4	miR-6762	MIR6762	0.0051957	0.87	31.5	38.12	0.83	HER2+
5	miR-3668	MIR3668	0.0055433	0.87	19.18	12.35	1.55	HER2-
6	miR-1343	MIR1343	0.005675	0.87	28.65	33.15	0.86	HER2+
7	miR-384	MIR384	0.0074167	0.87	11.83	8.36	1.41	HER2-
8	miR-4535	MIR4535	0.0076342	0.87	12.04	14.31	0.84	HER2+
9	miR-146a	MIR146A	0.0077449	0.87	47.92	63.73	0.75	HER2+
10	miR-6825	MIR6825	0.0079189	0.87	206.76	245.99	0.84	HER2+
11	miR-5701	MIR5701-1/-2/-3 (3 precursors)	0.0084427	0.87	9.66	7.61	1.27	HER2-
12	miR-496	MIR496	0.0086262	0.87	6.77	8.02	0.84	HER2+
13	miR-550b-1	MIR550B1	0.008921	0.87	17.5	21.27	0.82	HER2+
14	miR-4520-1	MIR4520-1	0.0091021	0.87	17.67	23.07	0.77	HER2+

## Sheet: HER2_probe_level
Rank	Probe set ID	Maps to mature miRNA	Nominal P	BH q-value	Mean HER2-	Mean HER2+	Fold change	Note
1	MIR4728	miR-4728	0.0005228	0.85	1187.02	5964.93	0.2	ERBB2-intronic; replicates in TCGA-BRCA
2	MIR7641-2 (probe A)	miR-7641	0.0029807	0.87	278301	159573	1.74	Probe A of MIR7641-2 precursor
3	MIR4311	miR-4311	0.0051466	0.87	53.56	64.06	0.84
4	MIR6762	miR-6762	0.0051957	0.87	31.5	38.12	0.83
5	MIR3668	miR-3668	0.0055433	0.87	19.18	12.35	1.55
6	MIR1343	miR-1343	0.005675	0.87	28.65	33.15	0.86
7	MIR7641-2 (probe B)	miR-7641	0.0063652	0.87	34299.3	23157.7	1.48	Probe B of MIR7641-2 precursor; same precursor as row 2
8	MIR384	miR-384	0.0074167	0.87	11.83	8.36	1.41
9	MIR4535	miR-4535	0.0076342	0.87	12.04	14.31	0.84
10	MIR146A	miR-146a	0.0077449	0.87	47.92	63.73	0.75
11	MIR6825	miR-6825	0.0079189	0.87	206.76	245.99	0.84
12	MIR5701-2 (precursor 2)	miR-5701	0.0084427	0.87	9.66	7.61	1.27	One of three MIR5701 precursor probes with identical summary statistics
13	MIR5701-3 (precursor 3)	miR-5701	0.0084427	0.87	9.66	7.61	1.27	Same mature miRNA as row 12; collapsed for Table 3
14	MIR5701-1 (precursor 1)	miR-5701	0.0084427	0.87	9.66	7.61	1.27	Same mature miRNA as row 12; collapsed for Table 3
15	MIR496	miR-496	0.0086262	0.87	6.77	8.02	0.84
16	MIR550B1	miR-550b-1	0.008921	0.87	17.5	21.27	0.82
17	MIR4520-1	miR-4520-1	0.0091021	0.87	17.67	23.07	0.77

## Sheet: Methods
Differential expression methods (matches main manuscript Methods).
Statistical framework: linear models with empirical-Bayes variance moderation (limma; Ritchie 2015).
Multiple testing: Benjamini-Hochberg over all 1,629 tested miRNAs (m = 1629).
Each contrast adjusted for the alternative receptor:
ER model: ~ ER_status + HER2_status
HER2 model: ~ HER2_status + ER_status
Probe-level redundancy handling:
- Multiple probe sets per precursor (e.g., MIR7641-2 probes A and B): kept separate at probe level;
collapsed by maximum-effect-size representative for the unique-miRNA table.
- Multiple precursors per mature miRNA (e.g., MIR5701-1/-2/-3 -> miR-5701): collapsed at the mature level.
Replication: TCGA-BRCA miRNA-seq (BCGSC workflow, GDC release v36). See Additional file 3 for the
reproducible R pipeline.
