# Supplementary material
Source: Research Square preprint supplement (doi:10.21203/rs.3.rs-9901552/v1)
Supplement: Supplementary file 2 [file 96c216fa1a27a4274369e257.xlsx]

## Sheet: Per-case cohort
Index	ER status	ER (%)	PR status	PR (%)	HER2 IHC	HER2 ISH (for IHC 2+)	HER2 final	Clinical (IHC) subtype
1	Negative	0	Negative	0	3+	Not applicable	Positive	HR-/HER2+
2	Positive	90	Positive	70	1+	Not applicable	Negative	HR+/HER2-
3	Positive	90	Positive	85	2+	Non-amplified	Negative	HR+/HER2-
4	Positive	95	Positive	85	0	Not applicable	Negative	HR+/HER2-
5	Positive	40	Positive	30	3+	Not applicable	Positive	HR+/HER2+
6	Positive	90	Negative	0	2+	Non-amplified	Negative	HR+/HER2-
7	Negative	0	Negative	0	1+	Not applicable	Negative	HR-/HER2-
8	Positive	40	Positive	40	0	Not applicable	Negative	HR+/HER2-
9	Negative	0	Negative	0	3+	Not applicable	Positive	HR-/HER2+
10	Negative	0	Negative	0	2+	Non-amplified	Negative	HR-/HER2-
11	Positive	95	Positive	95	1+	Not applicable	Negative	HR+/HER2-
12	Positive	95	Positive	95	0	Not applicable	Negative	HR+/HER2-
13	Positive	90	Negative	0	1+	Not applicable	Negative	HR+/HER2-
14	Positive	30	Positive	30	1+	Not applicable	Negative	HR+/HER2-
15	Positive	95	Positive	30	1+	Not applicable	Negative	HR+/HER2-
16	Positive	95	Positive	20	0	Not applicable	Negative	HR+/HER2-
17	Positive	95	Positive	15	0	Not applicable	Negative	HR+/HER2-
18	Positive	95	Positive	80	1+	Not applicable	Negative	HR+/HER2-
19	Negative	0	Negative	0	0	Not applicable	Negative	HR-/HER2-
20	Positive	90	Positive	90	1+	Not applicable	Negative	HR+/HER2-
21	Negative	0	Negative	0	0	Not applicable	Negative	HR-/HER2-
22	Negative	0	Negative	0	0	Not applicable	Negative	HR-/HER2-
23	Positive	90	Positive	20	1+	Not applicable	Negative	HR+/HER2-
24	Positive	95	Positive	20	1+	Not applicable	Negative	HR+/HER2-
25	Positive	95	Positive	95	1+	Not applicable	Negative	HR+/HER2-
26	Positive	90	Positive	40	0	Not applicable	Negative	HR+/HER2-
27	Positive	95	Positive	95	0	Not applicable	Negative	HR+/HER2-
28	Negative	0	Negative	0	2+	Amplified	Positive	HR-/HER2+
29	Positive	85	Positive	3	3+	Not applicable	Positive	HR+/HER2+
30	Positive	95	Positive	95	0	Not applicable	Negative	HR+/HER2-
31	Negative	0	Negative	0	3+	Not applicable	Positive	HR-/HER2+
32	Positive	90	Positive	95	1+	Not applicable	Negative	HR+/HER2-
33	Positive	80	Positive	80	0	Not applicable	Negative	HR+/HER2-
34	Positive	90	Negative	0	2+	Amplified	Positive	HR+/HER2+
35	Positive	80	Positive	65	1+	Not applicable	Negative	HR+/HER2-
36	Positive	95	Positive	40	1+	Not applicable	Negative	HR+/HER2-
37	Positive	90	Negative	0	1+	Not applicable	Negative	HR+/HER2-
38	Positive	95	Positive	85	0	Not applicable	Negative	HR+/HER2-
39	Positive	70	Negative	0	3+	Not applicable	Positive	HR+/HER2+
40	Positive	95	Positive	95	0	Not applicable	Negative	HR+/HER2-
41	Positive	95	Positive	95	0	Not applicable	Negative	HR+/HER2-
42	Positive	90	Positive	30	1+	Not applicable	Negative	HR+/HER2-
43	Negative	0	Negative	0	3+	Not applicable	Positive	HR-/HER2+
44	Positive	95	Positive	75	0	Not applicable	Negative	HR+/HER2-
45	Positive	90	Positive	90	1+	Not applicable	Negative	HR+/HER2-
46	Positive	90	Positive	80	0	Not applicable	Negative	HR+/HER2-
47	Negative	0	Negative	0	0	Not applicable	Negative	HR-/HER2-
48	Negative	0	Negative	0	2+	Amplified	Positive	HR-/HER2+
49	Negative	0	Negative	0	0	Not applicable	Negative	HR-/HER2-
50	Positive	90	Positive	95	1+	Not applicable	Negative	HR+/HER2-
51	Positive	80	Positive	50	2+	Amplified	Positive	HR+/HER2+
52	Positive	40	Positive	30	3+	Not applicable	Positive	HR+/HER2+
53	Positive	95	Positive	20	1+	Not applicable	Negative	HR+/HER2-
54	Positive	90	Positive	90	0	Not applicable	Negative	HR+/HER2-
55	Positive	95	Positive	95	1+	Not applicable	Negative	HR+/HER2-
56	Positive	95	Positive	95	0	Not applicable	Negative	HR+/HER2-
57	Positive	1	Negative	0	0	Not applicable	Negative	HR+/HER2-
58	Negative	0	Negative	0	0	Not applicable	Negative	HR-/HER2-
59	Positive	95	Positive	90	1+	Not applicable	Negative	HR+/HER2-
60	Positive	90	Positive	80	1+	Not applicable	Negative	HR+/HER2-
61	Positive	95	Positive	95	0	Not applicable	Negative	HR+/HER2-
62	Negative	0	Negative	0	2+	Non-amplified	Negative	HR-/HER2-
63	Positive	95	Positive	95	2+	Non-amplified	Negative	HR+/HER2-
64	Negative	0	Negative	0	2+	Non-amplified	Negative	HR-/HER2-
65	Positive	90	Positive	90	1+	Not applicable	Negative	HR+/HER2-
66	Positive	95	Positive	75	1+	Not applicable	Negative	HR+/HER2-
67	Positive	90	Negative	0	0	Not applicable	Negative	HR+/HER2-
68	Positive	90	Positive	90	1+	Not applicable	Negative	HR+/HER2-
69	Negative	0	Negative	0	1+	Not applicable	Negative	HR-/HER2-
70	Negative	0	Negative	0	0	Not applicable	Negative	HR-/HER2-
71	Positive	90	Positive	1	0	Not applicable	Negative	HR+/HER2-
72	Positive	75	Negative	0	3+	Not applicable	Positive	HR+/HER2+
73	Positive	90	Positive	20	1+	Not applicable	Negative	HR+/HER2-
74	Positive	90	Positive	35	1+	Not applicable	Negative	HR+/HER2-
75	Positive	90	Positive	50	1+	Not applicable	Negative	HR+/HER2-
76	Positive	90	Positive	90	0	Not applicable	Negative	HR+/HER2-
77	Negative	0	Negative	0	2+	Non-amplified	Negative	HR-/HER2-
78	Positive	95	Positive	95	0	Not applicable	Negative	HR+/HER2-
79	Positive	95	Positive	90	0	Not applicable	Negative	HR+/HER2-
80	Negative	0	Negative	0	1+	Not applicable	Negative	HR-/HER2-
81	Positive	85	Positive	30	3+	Not applicable	Positive	HR+/HER2+
82	Positive	95	Positive	95	0	Not applicable	Negative	HR+/HER2-
83	Positive	95	Positive	20	1+	Not applicable	Negative	HR+/HER2-
84	Negative	0	Negative	0	0	Not applicable	Negative	HR-/HER2-
85	Positive	90	Positive	50	0	Not applicable	Negative	HR+/HER2-
86	Negative	0	Negative	0	3+	Not applicable	Positive	HR-/HER2+
87	Positive	90	Positive	35	2+	Non-amplified	Negative	HR+/HER2-
88	Positive	90	Positive	50	1+	Not applicable	Negative	HR+/HER2-
89	Positive	90	Positive	90	2+	Non-amplified	Negative	HR+/HER2-
90	Negative	0	Negative	0	1+	Not applicable	Negative	HR-/HER2-
91	Positive	90	Positive	95	1+	Not applicable	Negative	HR+/HER2-
92	Positive	90	Positive	80	1+	Not applicable	Negative	HR+/HER2-
93	Positive	85	Negative	0	3+	Not applicable	Positive	HR+/HER2+
94	Negative	0	Negative	0	3+	Not applicable	Positive	HR-/HER2+
95	Positive	95	Positive	95	1+	Not applicable	Negative	HR+/HER2-
96	Positive	90	Positive	1	0	Not applicable	Negative	HR+/HER2-
97	Negative	0	Negative	0	2+	Non-amplified	Negative	HR-/HER2-
98	Positive	90	Negative	0	1+	Not applicable	Negative	HR+/HER2-
99	Positive	90	Positive	90	1+	Not applicable	Negative	HR+/HER2-
100	Negative	0	Negative	0	1+	Not applicable	Negative	HR-/HER2-
101	Positive	95	Positive	95	0	Not applicable	Negative	HR+/HER2-
102	Negative	0	Negative	0	3+	Not applicable	Positive	HR-/HER2+
103	Negative	0	Negative	0	0	Not applicable	Negative	HR-/HER2-
104	Positive	90	Positive	75	2+	Non-amplified	Negative	HR+/HER2-

## Sheet: Notes
Additional file 1. Per-case clinico-pathological listing of the discovery cohort (n = 104).
Column definitions:
Index — case identifier (de-identified; sequential).
ER status — IHC ER positivity (>=1% nuclear staining = Positive).
ER (%) — percentage of ER-positive tumour-cell nuclei.
PR status — IHC PR positivity (>=1% nuclear staining = Positive).
PR (%) — percentage of PR-positive tumour-cell nuclei.
HER2 IHC — HER2 IHC score (0, 1+, 2+, or 3+).
HER2 ISH — dual-probe in-situ hybridization result for IHC 2+ equivocal cases per 2018/2023 ASCO/CAP guideline.
Amplified = HER2/CEP17 ratio >=2.0 or HER2 copy >=6.0; otherwise Non-amplified.
Reported as "Not applicable" for IHC 0, 1+, and 3+ cases (no reflex ISH performed).
HER2 final — final HER2 status used for the differential-expression analysis (combined IHC + ISH).
Clinical (IHC) subtype — HR (ER+ and/or PR+) / HER2 combination.
Summary counts:
ER+: 76; ER-: 28
HER2+: 18 (14 IHC 3+; 4 IHC 2+/ISH-amplified)
HER2-: 86 (36 IHC 0; 39 IHC 1+; 11 IHC 2+/ISH-non-amplified)
HR+/HER2-: 67; HR+/HER2+: 9; HR-/HER2+: 9; HR-/HER2-: 19
Source: Taipei Veterans General Hospital, IRB-approved breast cancer cohort (n=104).
